# Supplementary material for: A meta-barcoding analysis of soil mycobiota of the upper Andean Colombian agro-environment
Source: PubMed Central journal article supplement (PMC6625999; doi:10.1038/s41598-019-46485-1), 2019-07-12
Supplement: 41598_2019_46485_MOESM1_ESM.pdf [file 41598_2019_46485_MOESM1_ESM.pdf]

## **A meta-barcoding analysis of soil mycobiota of the upper Andean Colombian agro-environment**

Angela Landinez-Torres <sup>a, b§</sup>, Simona Panelli <sup>c§</sup>, Anna Maria Picco <sup>a</sup>, Francesco Comandatore <sup>c</sup>, Solveig Tosi <sup>a\*</sup>, Enrica Capelli <sup>d, e</sup>

<sup>a</sup> Mycology Laboratory, Department of Earth and Environmental Sciences, University of Pavia, Via Ferrata 7, 27100, Pavia, Italy

<sup>b</sup> Facultad de Ciencias Agrarias y Ambientales, Fundación Universitaria Juan de Castellanos. Carrera 11 No. 11 - 44 Tunja, Boyacá – Colombia

<sup>c</sup> Pediatric Clinical Research Center Romeo ed Enrica Invernizzi, University of Milan, Via G.B. Grassi 74, 20157, Milan, Italy

<sup>d</sup> Genetic Analysis Laboratory, Department of Earth and Environmental Sciences, University of Pavia, Via Ferrata 7, 27100, Pavia, Italy

<sup>e</sup> Centre for Health Technologies (C.H.T.), University of Pavia, Via Ferrata 1, 27100, Pavia, Italy

§ Joint first authors

\* Corresponding author

Email address: [solveig.tosi@unipv.it](mailto:solveig.tosi@unipv.it)

**Supplementary information**  
**Legends for supplementary tables**

**Supplementary table 1.** Agronomic management of orchards

**Supplementary table 2.** *Ascomycota* OTU analysis and identification: Fungal species identified in the different sampling sites, ordered following their taxonomy. Abundance (%) per site is shown. Identifications have been performed against the GenBank, Mycobank and RDP classifier databases.

**Supplementary table 3.** *Basidiomycota* OTU analysis and identification: Fungal species identified in the different sampling sites, ordered following their taxonomy. Abundance (%) per site is shown. Identifications have been performed against the GenBank, Mycobank and RDP classifier databases.

**Supplementary table 4.** *Zygomycota* OTU analysis and identification: Fungal species identified in the different sampling sites, ordered following their taxonomy. Abundance (%) per site is shown. Identifications have been performed against the GenBank, Mycobank and RDP classifier databases.

**Supplementary Table 5.** *Glomeromycota* OTU analysis and identification: Fungal species identified in the different sampling sites, ordered following their taxonomy. Abundance (%) per site is shown. Identifications have been performed against the GenBank, Mycobank and RDP classifier databases.

**Supplementary Table 6.** *Chytridiomycota* OTU analysis and identification: Fungal species identified in the different sampling sites, ordered following their taxonomy. Abundance (%) per site is shown. Identifications have been performed against the GenBank, Mycobank and RDP classifier databases.
